# Supplementary material for: Self-Efficacy and Self-Care as Risk Factors for Ischemic Stroke: Development and Validation of a Nomogram
Source: MDPI journal article supplement (doi:10.3390/jcm12175665), 2023-08-31
Supplement: s1 [file s1]

### S1. R code for the nomogram development and validation

```
library(rms)

n<- 1000

set.seed(1000)

d<-data.frame(Stroke_Score = rnorm(n,9,0.6),
              Self_Care_Score = rnorm(n,35,2),
              Self_Efficacy_Score = rnorm(n,37,3))

L<-7.131 + 1.257*d$Stroke_Score + -0.284*d$Self_Care_Score + -0.202*d$Self_Efficacy_Score

p<-plogis(L)

d$y<- rbinom(n=1000, size = 1, prob = p)

table(d$y)

ddist <- datadist(d)

f<- lrm(y ~ Stroke_Score + Self_Care_Score + Self_Efficacy_Score, data = d)

f

# Create nomogram

options(datadist = 'ddist')

nom <- nomogram(f, fun = plogis, funlabel = "Risk of Stroke")

plot(nom)

#new data for calibration

new_d <- data.frame(Stroke_Score = rnorm(1000,9,0.6),
                  Self_Care_Score = rnorm(1000,35,2),
                  Self_Efficacy_Score = rnorm(1000,37,3))

new_d$y<- rbinom(n=1000, size = 1, prob = p)

#calibration

library(predtools)

library(magrittr)

library(dplyr)
```

```
library(ggplot2)
```

```
f<- glm(y ~ Stroke_Score + Self_Care_Score + Self_Efficacy_Score,d, family=binomial)
```

```
pd <- with(d, data.frame(y = ifelse(y, 1, 0),  
                           prob = predict(f, type = "response")))
```

```
ggplot(pd, aes(prob, y)) +  
  geom_point(shape = 21, size = 2) +  
  geom_abline(slope = 1, intercept = 0) +  
  geom_smooth(method = stats::loess, se = FALSE) +  
  scale_x_continuous(breaks = seq(0, 1, 0.1)) +  
  scale_y_continuous(breaks = seq(0, 1, 0.1)) +  
  xlab("Estimated Prob.") +  
  ylab("Data w/ Empirical Prob.") +  
  ggtitle("Logistic Regression Calibration Plot")
```

```
#Decision curve analysis
```

```
library(dcurves)
```

```
library(gtsummary); library(dplyr); library(tidyr)
```

```
library(labelled)
```

```
mod2 <- glm(y ~ Stroke_Score + Self_Care_Score + Self_Efficacy_Score, d, family = binomial)
```

```
tbl_regression(mod2, exponentiate = TRUE)
```

```
d<- d %>%
```

```
  mutate(  
    strokepred =  
      broom::augment(mod2, type.predict = "response") %>%  
      pull(".fitted")  
  )
```

```
dca(y ~ strokepred,
    data = d,
    thresholds = seq(0, 1, 0.01),
    label = list(strokepred = "Prediction Model")
) %>%
plot(smooth = FALSE)
```

```
#cds table
dca(y ~ strokepred,
    data = d,
    as_probability = "strokepred",
    thresholds = seq(0, 1, 0.05)
) %>%
as_tibble() %>%
select(label, threshold, net_benefit) %>%
gt::gt() %>%
gt::fmt_percent(columns = threshold, decimals = 0) %>%
gt::fmt(columns = net_benefit, fns = function(x) style_sigfig(x, digits = 3)) %>%
gt::cols_label(
    label = "Strategy",
    threshold = "Decision Threshold",
    net_benefit = "Net Benefit"
) %>%
gt::cols_align("left", columns = label)
```

```
#dynamic nomogram
```

```
library(DynNom)
```

```
f<- glm(y ~ Stroke_Score + Self_Care_Score + Self_Efficacy_Score,d, family=binomial)
```

DynNom(f)

DNbuilder(f, d, clevel = 0.774)
